# Supplementary material for: TiO2 nanotube arrays loaded with reduced graphene oxide films: facile hybridization and promising photocatalytic application
Source: Royal Society of Chemistry journal article supplement (doi:10.1039/c4ta06354f), 2014-12-16
Supplement: c4ta06354f1.pdf [file c4ta06354f1.pdf]

## *Supporting Information*

### **TiO<sub>2</sub> nanotube arrays loaded with reduced graphene oxide films:**

### **Facile hybridization and promising photocatalytic application**

*Mingzheng Ge, <sup>a</sup> Shuhui Li, <sup>a</sup> Jianying Huang, \*<sup>a</sup> Keqin Zhang, \*<sup>a,b</sup> Salem S. Al-Deyab, <sup>c</sup> and*

*Yuekun Lai \*<sup>a,b</sup>*

*<sup>a</sup> National Engineering Laboratory for Modern Silk, College of Textile and Clothing Engineering, Soochow University, Suzhou 215123, China.*

*<sup>b</sup> Research Center of Cooperative Innovation for Functional Organic / Polymer Material Micro/Nanofabrication, Soochow University, Suzhou, Jiangsu 215123, China.*

*<sup>c</sup> Department of Chemistry, College of Science, King Saud University, Riyadh 11451, Saudi Arabia.*

*Corresponding author email: yklai@suda.edu.cn; kqzhang@suda.edu.cn; jyhuang81@suda.edu.cn*

### **Supporting figure captions:**

**Figure S1.** Photocurrent responses with bias potential at 1.0 V in 0.1 M Na<sub>2</sub>SO<sub>4</sub> solution (a) and photodegradation of MO for GO-TiO<sub>2</sub> NTAs with different cycle numbers at 5, 10, 15, 20, 28 and 35 (b).

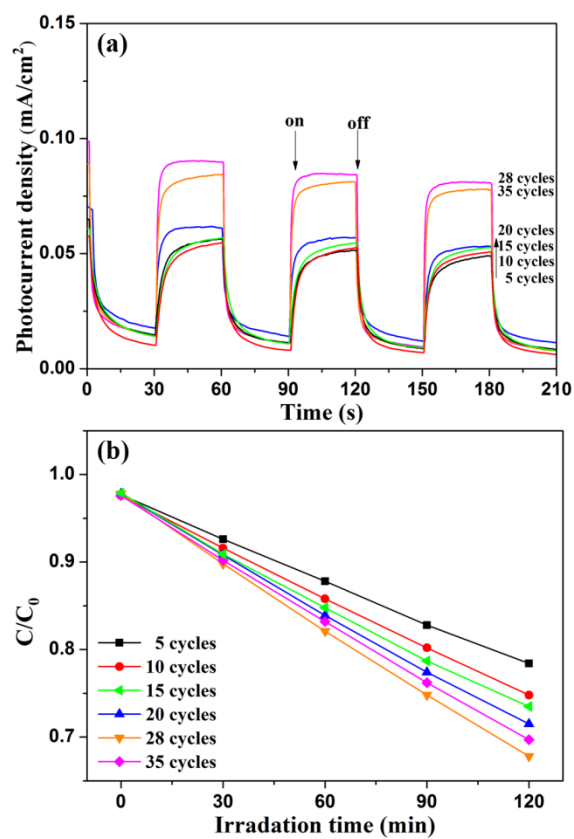

**Figure S1.** Photocurrent responses with bias potential at 1.0 V in 0.1 M Na<sub>2</sub>SO<sub>4</sub> solution (a) and photodegradation of MO for GO-TiO<sub>2</sub> NTAs with different cycle numbers at 5, 10, 15, 20, 28 and 35 (b).
